# Supplementary material
Source: publisher figshare collection journal article supplement (https://gsajournals.figshare.com/articles/dataset/_/11833482)
Supplement: Supplementary file 1 [file 1]

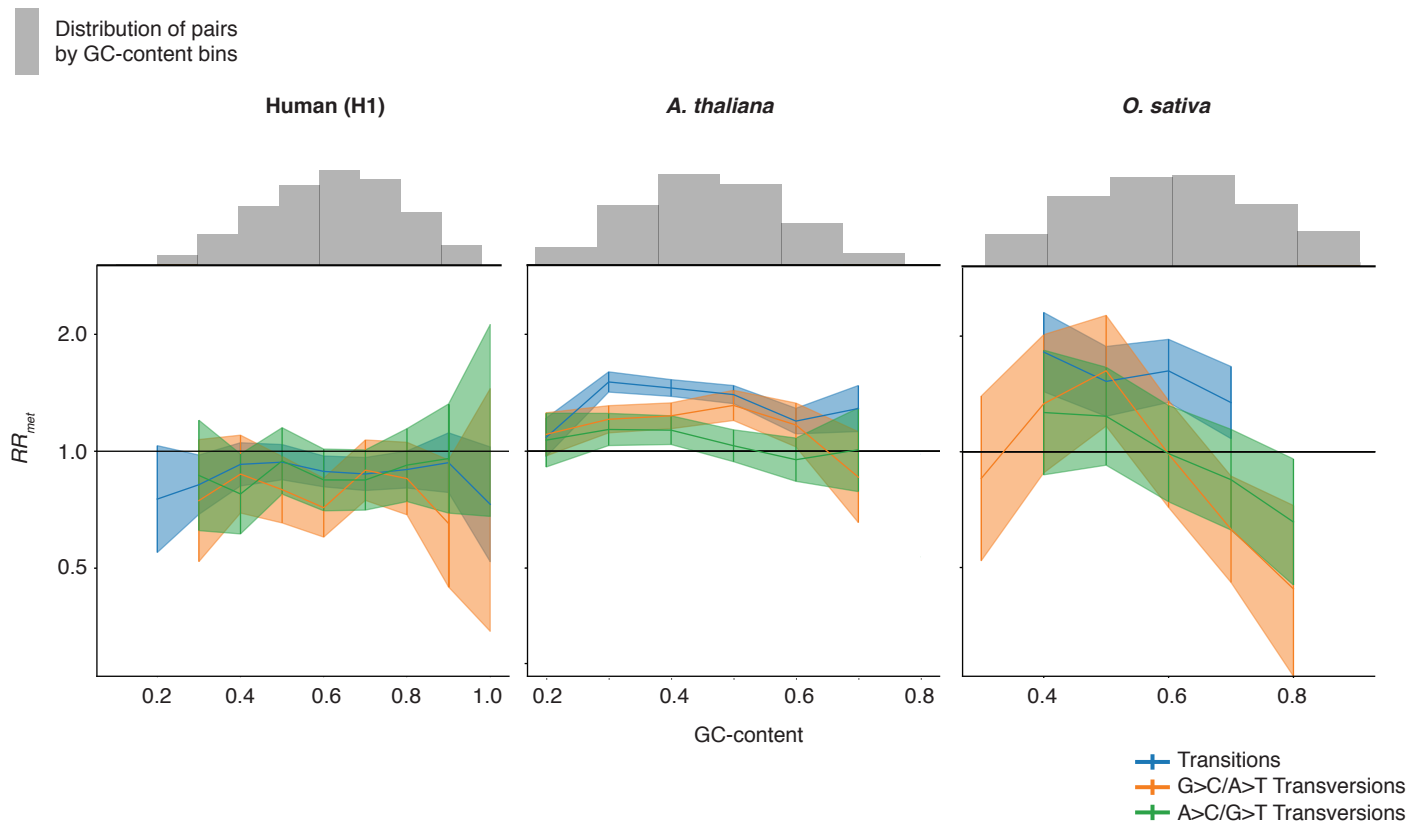

**Figure S3.** The relative mutational risk of methylation ( $RR_{met}$ ) at CpG-neighbouring nucleotides in human, *A. thaliana*, and rice as a function of motif GC content.  $RR_{met}$  was calculated based on GC content bins.  $RR_{met}$  estimates are omitted where error bars were larger than the plotting range. Vertical bars are confidence intervals on  $RR_{met}$  computed using the delta method.
