# Supplementary material
Source: publisher figshare collection journal article supplement (https://gsajournals.figshare.com/articles/dataset/_/11833482)
Supplement: Supplementary file 2 [file 1]

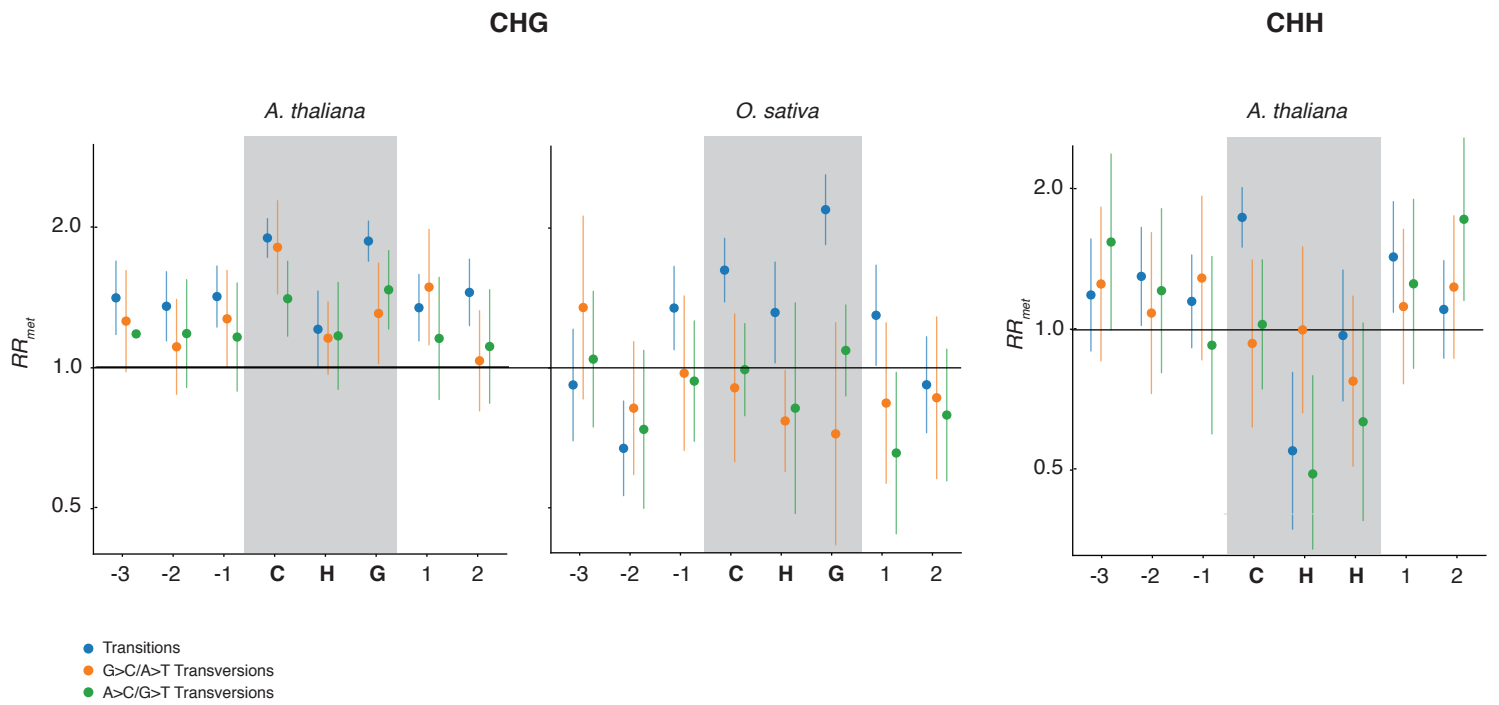

**Figure S1.** The relative mutational risk of methylation ( $RR_{met}$ ) at CpHpG and CpHpH sites and neighbouring nucleotides in *A. thaliana* and rice.  $RR_{met}$  estimates for CpHpH in rice are too noisy to be informative and are therefore not shown. P-values for overall  $RR_{met}$  estimates are: CpHpG (*A. thaliana*):  $P=3.8 \times 10^{-19}$ ; CpHpH (*A. thaliana*):  $P=1.8 \times 10^{-8}$ ; CpHpG (*O. sativa*):  $P=0.043$ . Vertical bars are confidence intervals on  $RR_{met}$  computed using the delta method.
