# Supplementary material
Source: publisher figshare collection journal article supplement (https://gsajournals.figshare.com/articles/dataset/_/11833482)
Supplement: Supplementary file 3 [file 1]

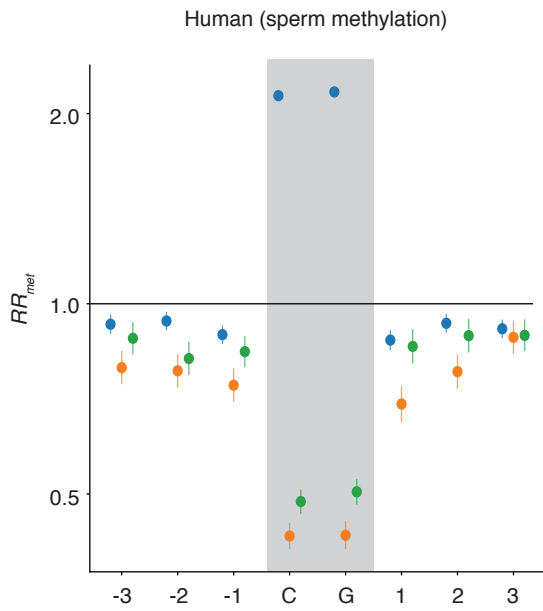

**Figure S5.** The relative mutational risk of methylation ( $RR_{met}$ ) at CpGs and neighbouring nucleotides in human, when site pairing is based on methylation data from sperm and considering singleton SNPs from the gnomAD database. Vertical bars are confidence intervals on  $RR_{met}$  computed using the delta method.
