# Supplementary material
Source: publisher figshare collection journal article supplement (https://gsajournals.figshare.com/articles/dataset/_/11833482)
Supplement: Supplementary file 5 [file 1]

## A. thaliana

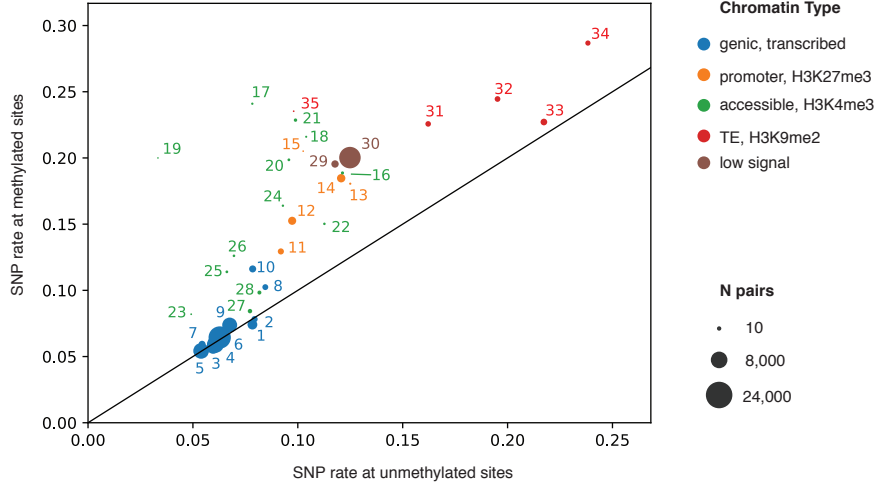

| State    | Preferential epigenetics marks                 | Preferential location          |
|----------|------------------------------------------------|--------------------------------|
| State 1  | H3.3                                           | 3'UTR                          |
| State 2  | H3.3, histone acetylation,H3K4me2,H2A.Z        | CDS,3'UTR                      |
| State 3  | H3K4me1,H3.3,H3.1                              | CDS                            |
| State 4  | H3K4me1,H3.3                                   | CDS,intron                     |
| State 5  | H3K4me1,H3K36me3,H3.3,H3.1                     | CDS                            |
| State 6  | H3K4me1,H3K36me3                               | intron                         |
| State 7  | H3K4me1,H3K36me3,H3K4me2                       | CDS,intron                     |
| State 8  | H3K4me1,H3K4me2,H2A.Z                          | CDS                            |
| State 9  | H3K4me1                                        | intron                         |
| State 10 | H2A.Z                                          | CDS,intron                     |
| State 11 | H3K27me3,H2A.Z,H3K4me2                         | CDS                            |
| State 12 | H3K27me3,H2A.Z                                 | Promoter,CDS,intron,intergenic |
| State 13 | H3K27me3,H2A.Z                                 | Promoter,intergenic            |
| State 14 | H3K27me3                                       | Promoter,intergenic            |
| State 15 | H3K27me3,accessible DNA                        | Promoter,intergenic            |
| State 16 | accessible DNA                                 | Promoter,intergenic            |
| State 17 | accessible DNA                                 | Promoter                       |
| State 18 | accessible DNA                                 | Promoter                       |
| State 19 | accessible DNA                                 | Promoter,snRNA                 |
| State 20 | accessible DNA                                 | Promoter                       |
| State 21 | accessible DNA                                 | Promoter                       |
| State 22 | histone acetylation,H3K4me2                    | coding gene,miRNA,snRNA        |
| State 23 | accessible DNA,H3K36ac,H3K56ac,H4K16ac,H3K4me3 | Promoter,5'UTR                 |
| State 24 | accessible DNA,histone acetylation,H3K4me3     | 5'UTR,snRNA                    |
| State 25 | histone acetylation,H3K4me3,H3K4me2,H2A.Z      | intron                         |
| State 26 | histone acetylation,H3K4me3,H3K4me2,H2A.Z      | CDS                            |
| State 27 | H3K4me2,histone acetylation,H3K4me3,H2A.Z      | CDS                            |
| State 28 | H3K4me3,H3K4me2,H2A.Z                          | intron                         |
| State 29 | weak signal                                    | intergenic                     |
| State 30 | rare signal                                    | intergenic                     |
| State 31 | DNA methylation,H3K9me2,H3K27me3               | intergenic,miRNA               |
| State 32 | DNA methylation,H3K9me2                        | intergenic,TE                  |
| State 33 | H3K9me2,DNA methylation                        | TE                             |
| State 34 | H3K9me2,DNA methylation,H3K27me1               | TE,miRNA                       |
| State 35 | H3K9me2,DNA methylation,H2A.X                  | intergenic,pericentromere      |
| State 36 | CENH3,H3K9me2,DNA methylation,accessible DNA   | rRNA,rRNA,centromere           |

## Human (H1)

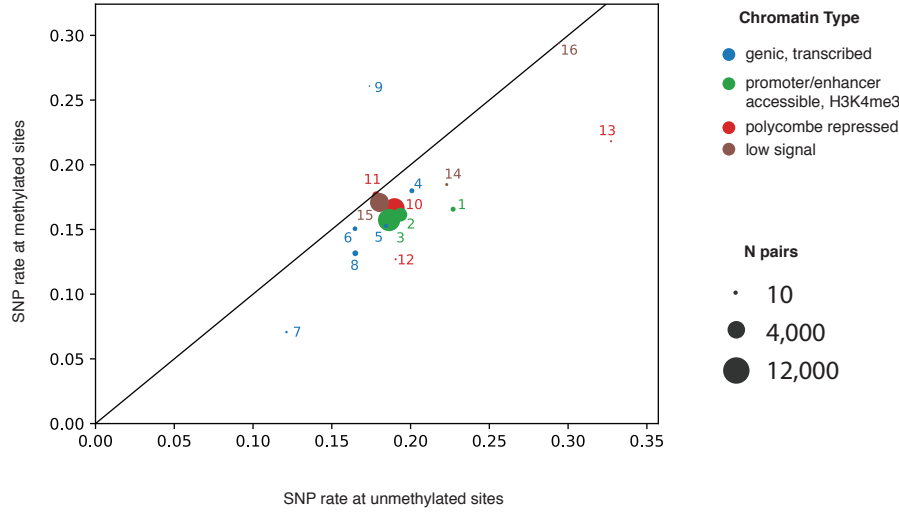

| State         | Preferential location |
|---------------|-----------------------|
| State 1_Pro   | Promoter              |
| State 2_Enh1  | Enhancer              |
| State 3_Enh1  | Enhancer              |
| State 4_Egn1  | Expressed gene        |
| State 5_Egn2  | Expressed gene        |
| State 6_Egn3  | Expressed gene        |
| State 7_Egn4  | Expressed gene        |
| State 8_Egn5  | Expressed gene        |
| State 9_Egn6  | Expressed gene        |
| State 10_Rep1 | Polycomb repressed    |
| State 11_Rep2 | Polycomb repressed    |
| State 12_Het1 | Heterochromatin       |
| State 13_Het2 | Heterochromatin       |
| State 14_Low1 | Low signal            |
| State 15_Low2 | Low signal            |
| State 16_Low3 | Low signal            |

## O. sativa

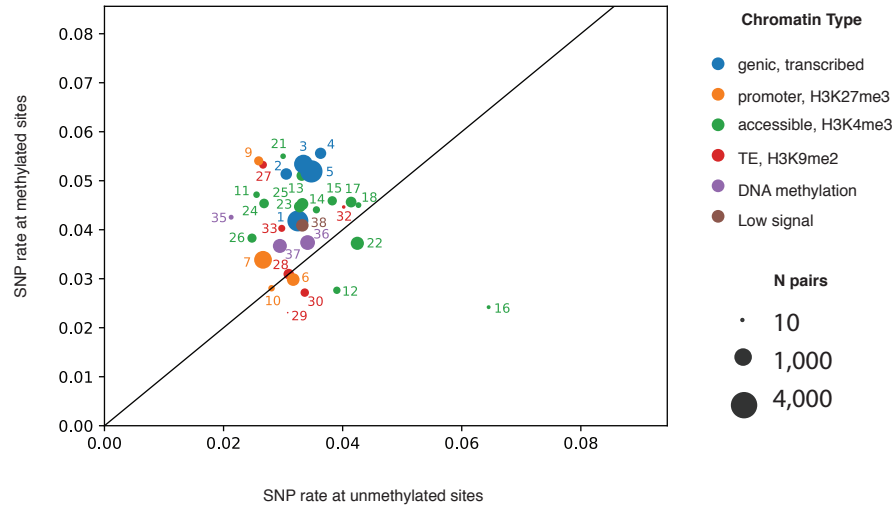

| State    | Preferential epigenetics marks                                    | Preferential location              |
|----------|-------------------------------------------------------------------|------------------------------------|
| State 1  | weak histone acetylation                                          | intron,promoter,3'UTR,intergenic   |
| State 2  | H3K36me3,histone acetylation                                      | promoter,3'UTR,intergenic          |
| State 3  | H3K36me3,histone acetylation                                      | 3'UTR                              |
| State 4  | H3K36me3,H3K36me3,H3K4me2                                         | exon                               |
| State 5  | H3K36me3,H3K4me2                                                  | intron                             |
| State 6  | H3K27me3                                                          | intergenic,intron,promoter         |
| State 7  | H3K27me3                                                          | intergenic,intron,promoter         |
| State 8  | H3K27me3                                                          | intergenic,intron,promoter         |
| State 9  | H3K27me3,H2A.Z                                                    | intergenic,intron,promoter         |
| State 10 | H3K27me3,H2A.Z,H3K36ac,H3K27ac,H3K4me3,H3K4me2                    | exon                               |
| State 11 | H3K36ac,H3K27ac,H3K4me3,H3K4me2,H3K27me3,H2A.Z                    | exon,promoter                      |
| State 12 | H2A.Z,histone acetylation,H3K4me2,H3K4me3                         | exon,promoter                      |
| State 13 | histone acetylation,H3K4me3,H3K4me2,H3K36me3,H3K36me2,H2A.Z       | 3'UTR                              |
| State 14 | H3K4me3,H3K4me3,H3K36me3,H2A.Z,histone acetylation                | intron                             |
| State 15 | H3K4me3,H3K4me3,H3K36me3                                          | intron                             |
| State 16 | H3K4me3,histone acetylation,H2A.Z                                 | exon,promoter,3'UTR                |
| State 17 | histone acetylation,accessible DNA,H3K4me2,H3K4me3                | promoter,axon,3'UTR                |
| State 18 | histone acetylation,accessible DNA,H2A.Z,H3K4me3                  | 3'UTR,promoter,intergenic          |
| State 19 | DNA methylation,H3K4me3,H4K12ac,H4K16ac,CANF-YB1,CANP-YB1         | exon,intron,promoter,intergenic    |
| State 20 | accessible DNA,H2A.Z,histone acetylation,H3K27me3,DNA methylation | intergenic,promoter,intron         |
| State 21 | accessible DNA                                                    | intergenic,promoter                |
| State 22 | accessible DNA                                                    | intergenic,promoter                |
| State 23 | accessible DNA                                                    | intergenic,promoter                |
| State 24 | accessible DNA                                                    | intergenic,promoter                |
| State 25 | H2A.Z,H3K4me2,H3K4me3,histone acetylation                         | promoter,intergenic,intron,3'UTR   |
| State 26 | DNA methylation,CANF-YB1                                          | intergenic,promoter,intron         |
| State 27 | H3K9me2,DNA methylation,CANF-YB1                                  | intergenic,TE,promoter,axon        |
| State 28 | H3K9me2,DNA methylation,Mnase                                     | TE,axon,intron,promoter,axon       |
| State 29 | DNA methylation,H3K9me2,CENH3,Mnase                               | TE,axon,intron,promoter,intergenic |
| State 30 | H3K9me2,DNA methylation                                           | TE,axon,intron,promoter,intergenic |
| State 31 | H3K9me2,CENH3,DNA methylation                                     | TE,intron,intergenic,axon,promoter |
| State 32 | H3K9me2,CENH3,DNA methylation,Mnase                               | TE,axon,intergenic,promoter,intron |
| State 33 | DNA methylation,H3K4me2                                           | intergenic,intron,promoter         |
| State 34 | DNA methylation,H3K36me3,H3K4me2                                  | intergenic,promoter,intron         |
| State 35 | DNA methylation,H3K27me3,H3K36me3,H3K36me2,H3K36me3               | intergenic,intron,promoter         |
| State 36 | DNA methylation,H3K36me3                                          | intergenic,promoter,intron         |
| State 37 | DNA methylation                                                   | intergenic,promoter                |
| State 38 | rare signal                                                       | intergenic,promoter,intron         |

**Figure S4.**  $RR_{met}$  in *A. thaliana*, human, and rice for different chromatin states, deconstructed into SNP rates at methylated and unmethylated sites across pairs. Individual chromatin states, classified as described in the Methods, are labelled and grouped into broader chromatin state classes, indicated by colour, based on key shared characteristics/marks.
